# Supplementary material for: Characterization, expression and function of the pyrokinins (PKs) in the giant freshwater prawn,Macrobrachium rosenbergii
Source: Oxford University Press journal article supplement (doi:10.1242/jeb.243742), 2022-05-17
Supplement: jeb243742supp.pdf [file jeb243742supp.pdf]

**Table S1.** Species names and NCBI accession numbers (or references) corresponding to multiple sequence alignment abbreviations.

| Abbreviations | Species                          | NCBI accession numbers/ References |
|---------------|----------------------------------|------------------------------------|
| Mro           | <i>Macrobrachium rosenbergii</i> | SRP049917                          |
| Cqa           | <i>Cherax quadricarinatus</i>    | AWK57536.1                         |
| Pva           | <i>Penaeus vannamei</i>          | Torfs et al., 2001                 |
| Ham           | <i>Homarus americanus</i>        | PRJNA300643                        |
| Spa           | <i>Scylla paramamosain</i>       | ALQ28575.1                         |
| Csa           | <i>Callinectes sapidus</i>       | Hui et al., 2012                   |
| Cbo           | <i>Cancer borealis</i>           | Saideman et al., 2007              |
| Nvi           | <i>Nezara viridula</i>           | Predel et al., 2008                |
| Aga           | <i>Austrophasma gansbaaiense</i> | B3A0D7.1                           |
| Lma           | <i>Leucophaea maderae</i>        | P13049.3                           |
| Lmi           | <i>Locusta migratoria</i>        | P85867.1                           |
| Dme           | <i>Drosophila melanogaster</i>   | AAF62876.1                         |

**Table S2. List of amino acid sequences corresponding to multiple sequence alignment abbreviations.**

>*Leucophaea maderae* PK1

QTSFTPRLG

>*Drosophila melanogaster* PK1

SVPFKPRLG

>*Locusta migratoria* PK1

QDSGDGWPQQPFVPRLG

>*Locusta migratoria* PK2

QSVPTFTPRLG

>*Nezara viridula* PK1

FYAPFSPRLG

>*Nezara viridula* PK2

QLVSFRPRLG

>*Nezara viridula* PK3

SPPFAPRLG

>*Austrophasma gansbaaiense* PK1

SPPFAPRLG

>*Austrophasma gansbaaiense* PK2

DPPFSPRLG

>*Austrophasma gansbaaiense* PK3

SSGGGEGSGMWFGRG

>*Macrobrachium rosenbergii* PK1

DFAFSPRLG

>*Macrobrachium rosenbergii* PK2

SPFSPRLG

>*Macrobrachium rosenbergii* PK3

VTTAFIPRLG

>*Scylla paramamosain* PK1

DSAFSPRLG

>*Scylla paramamosain* PK2

LYFAPRLG

>*Scylla paramamosain* PK3

TSFAFSPRLG

>*Cherax quadricarinatus* PK1

ADFAFSPRLG

>*Cherax quadricarinatus* PK2

ADFAFNPRLG

>*Cherax quadricarinatus* PK3

ADFAFRPRLG

>*Penaeus vannamei* PK1

DFAFSPRLG

>*Penaeus vannamei* PK2

ADFAFNPRLG

>*Callinectes sapidus* PK1

TNFAFSPRLG

>*Homarus americanus* PK1

GDGFAFSPRLG

>*Homarus americanus* PK2

GADFAFSPRLG

>*Homarus americanus* PK3

SDFAFSPRLG

>*Homarus americanus* PK4

AYFSPRLG

>*Homarus americanus* PK5

SLFSPRLG

>*Cancer borealis* PK1

TNFAFSPRLG

>*Cancer borealis* PK2

SGGFAFSPRLG

*MroPK*

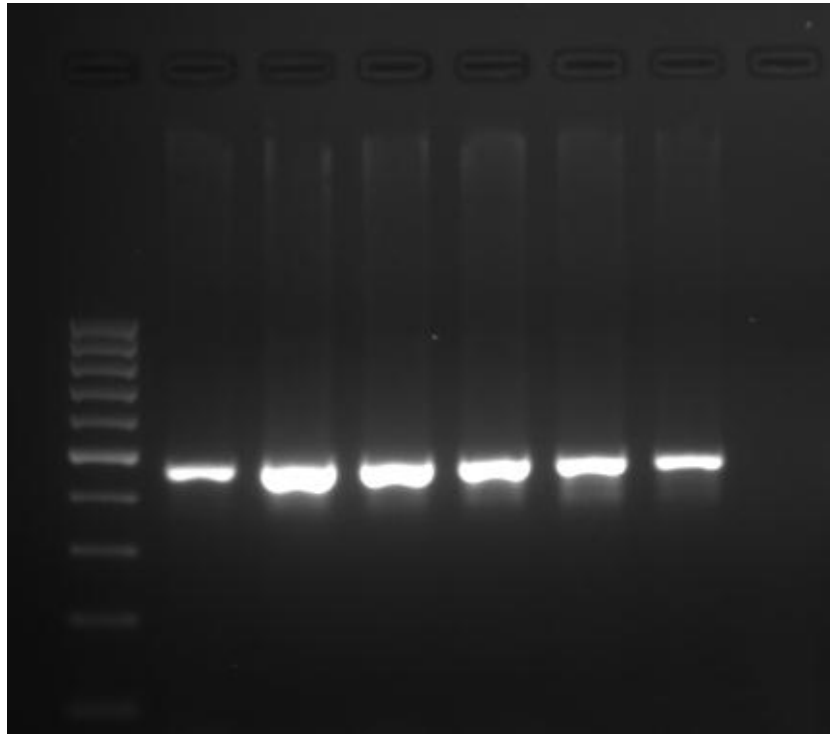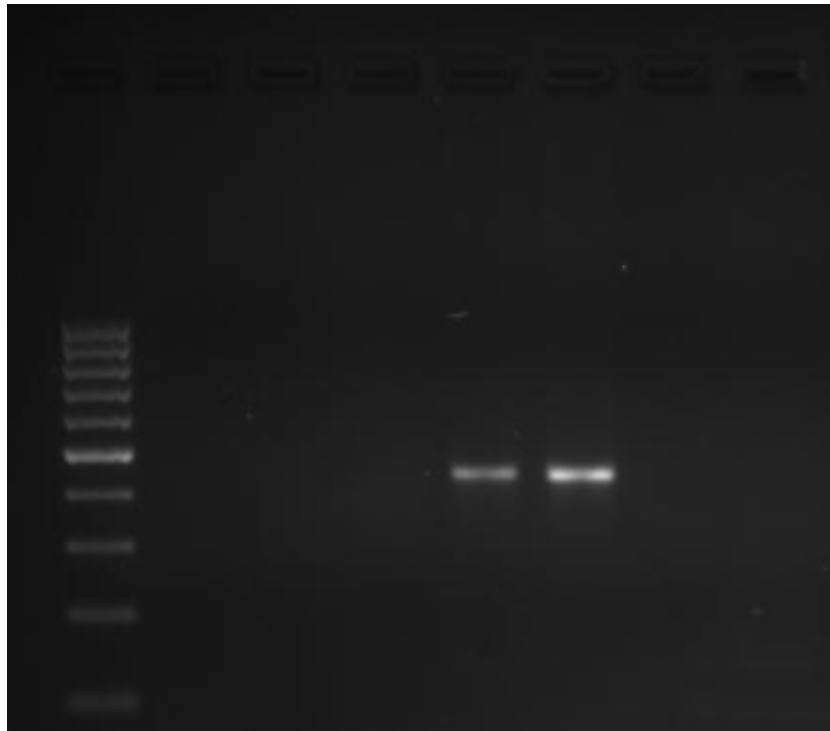

*Beta-actin*

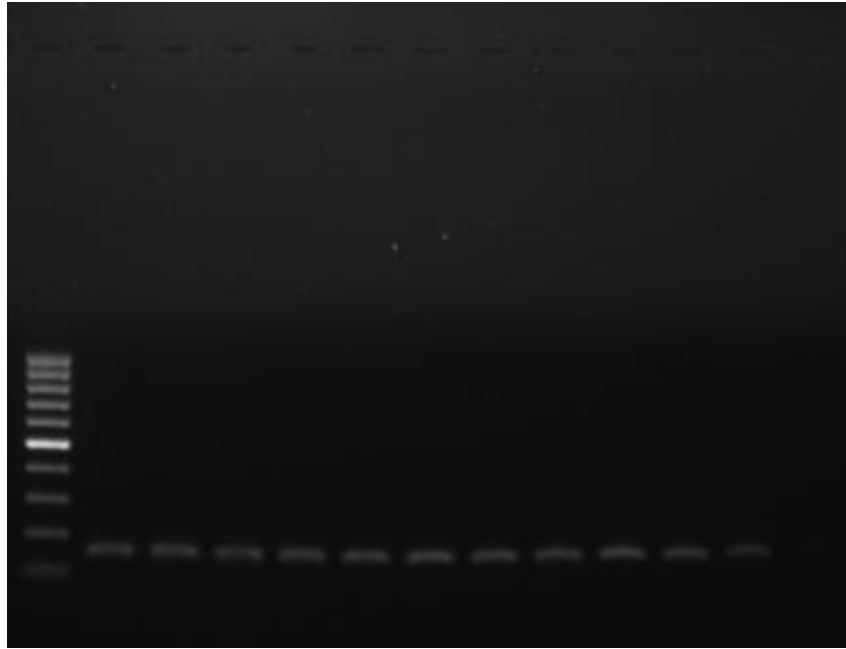

**Fig. S1.** Full images of agarose gel showing tissue-specific expression of *MroPK* and *beta-actin* gene.
